# Supplementary material
Source: PubMed Central journal article supplement (PMC8936843)
Supplement: bmjstel-2020-000645supp001.pdf [file bmjstel-2020-000645supp001.pdf]

University of Queensland  
**Student Perceptions of Peer Assisted Learning Using Scenario Based Simulation**

**Focus group questions**

- What was your initial reaction when you found out that this session would involve peer learning?
  - How has that changed after the session?
- \*What do you think the advantages were for you in participating in the PALSsim?
  - as a learner?
  - as a peer tutor/facilitator?
- \*What do you think the disadvantages were for you in participating in the PALSsim?
  - as a learner?
  - as a peer tutor/facilitator?
- What was the value of writing scenarios in the simulation session?
- What value was there in 'acting' as the patient?
- What value was there in 'acting' as the nurse?
- What value was there in 'acting' as the doctor receiving referrals?
- What was most helpful in guidance from the facilitator when you were developing and delivering the scenario?
- Was anything challenging when running the scenario?
- What was the value of participating in scenarios written by peers?
- How did the PALSsim compare to sim sessions run by facilitators only?
- \*What do you think you gained from the session?
- Did your thoughts about critical care/ emergency medicine change as a result of the session?
- Have your thoughts about simulation changed as a result of the session?

University of Queensland

## Student Perceptions of Peer Assisted Learning Using Scenario Based Simulation

| Date:                                                                                                     | Location: UQ      | Rotation: |         |       |                |
|-----------------------------------------------------------------------------------------------------------|-------------------|-----------|---------|-------|----------------|
| Please indicate your level of agreement with the following:                                               | Strongly Disagree | Disagree  | Neutral | Agree | Strongly Agree |
| I am better able to manage emergency / deteriorating patients as a result of the peer learning simulation |                   |           |         |       |                |
| I found value in writing / running a scenario compared to just participating in one                       |                   |           |         |       |                |
| My team was able to deliver an effective simulation session                                               |                   |           |         |       |                |
| I had valuable contributions to make to my peer colleagues' learning                                      |                   |           |         |       |                |
| I found it difficult to receive feedback from a peer                                                      |                   |           |         |       |                |
| I found it difficult to deliver feedback to a peer                                                        |                   |           |         |       |                |
| I found educational value in my peer's feedback on my performance                                         |                   |           |         |       |                |
| I understand the patient experience better as a result of delivering the simulation                       |                   |           |         |       |                |

What do you think the advantages/disadvantages were for you in participating in the PALSsim?

As a learner?

As a peer tutor/facilitator?

|                                                                                                         |
|---------------------------------------------------------------------------------------------------------|
| <p>What do you think you gained from the session?</p>                                                   |
| <p>How did your thoughts about critical care/ emergency medicine change as a result of the session?</p> |
| <p><b>Other comments:</b></p>                                                                           |

|                                                                                                                                                                          |                                                                                                                                                                                                                                                                                                                          |                 |           |                 |
|--------------------------------------------------------------------------------------------------------------------------------------------------------------------------|--------------------------------------------------------------------------------------------------------------------------------------------------------------------------------------------------------------------------------------------------------------------------------------------------------------------------|-----------------|-----------|-----------------|
| <p><b>Overall, I would give this session a rating of</b><br/> <b>(1=Very Unsatisfactory; 2=Unsatisfactory; 3=Satisfactory;</b><br/> <b>4=Very Good; 5=Excellent)</b></p> |                                                                                                                                                                                                                                                                                                                          |                 |           |                 |
| <p>I would recommend this session to my peers (please circle)</p>                                                                                                        | <table border="1" style="width: 100%; border-collapse: collapse;"> <tr> <td style="width: 33%; text-align: center; padding: 5px;"><b>YES</b></td> <td style="width: 33%; text-align: center; padding: 5px;"><b>NO</b></td> <td style="width: 33%; text-align: center; padding: 5px;"><b>Possibly</b></td> </tr> </table> | <b>YES</b>      | <b>NO</b> | <b>Possibly</b> |
| <b>YES</b>                                                                                                                                                               | <b>NO</b>                                                                                                                                                                                                                                                                                                                | <b>Possibly</b> |           |                 |
